# Supplementary material
Source: Springer Nature journal article supplement (https://www.springermedizin.de/resource/supplementary/13034_2008_26_MOESM2_ESM.pdf/9652162)

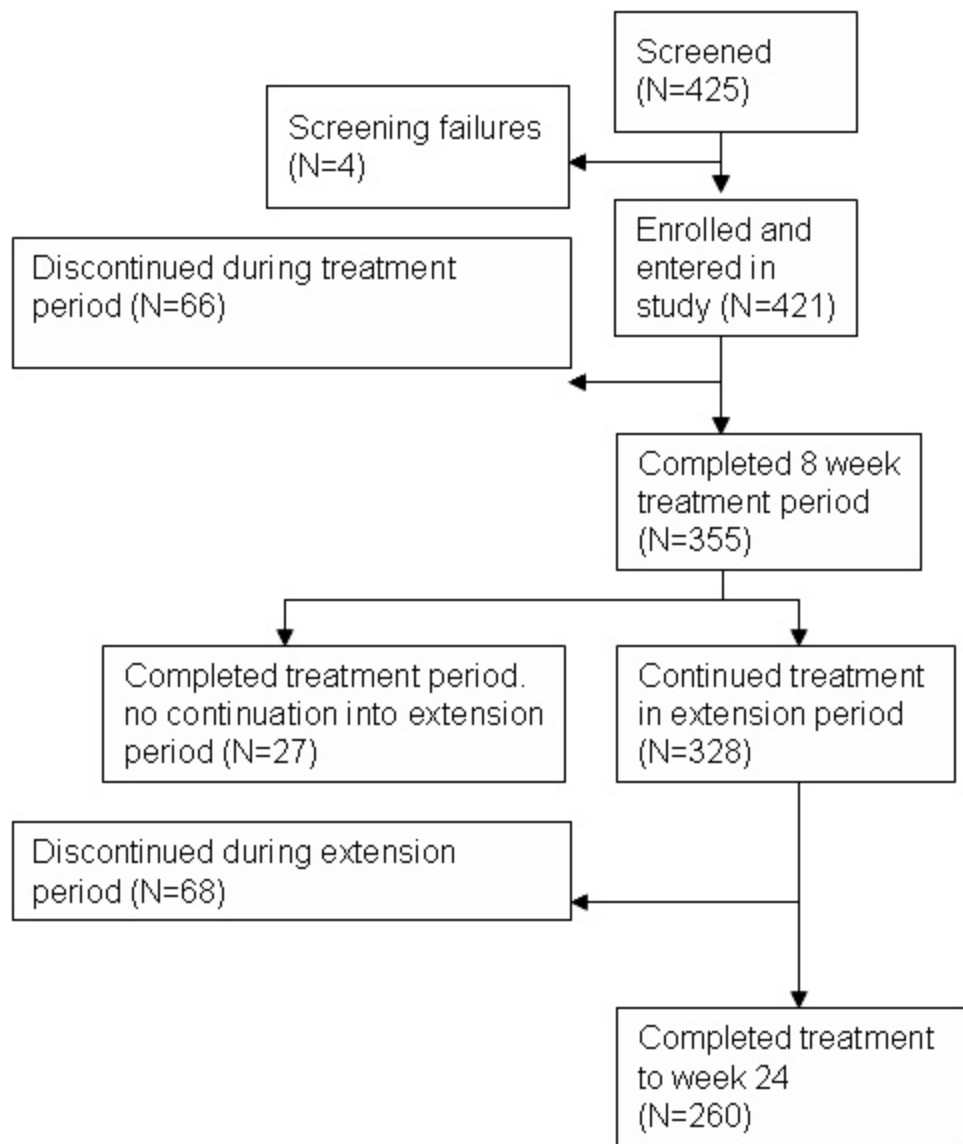

Supplement: MOESM2 [file 9652162]
